# Supplementary material
Source: PubMed Central journal article supplement (PMC2843906)
Supplement: NIHMS178520-supplement-1_si_001.pdf [file NIHMS178520-supplement-1_si_001.pdf]

Supporting information for the article: Ion Selectivity of  $\alpha$ -Hemolysin with  $\beta$ -Cyclodextrin Adapter: II. Multi-Ion Effects Studied with Grand Canonical Monte Carlo/Brownian Dynamics Simulations. Bernhard Egwolf, Yun Luo, D. Eric Walters, and Benoît Roux.

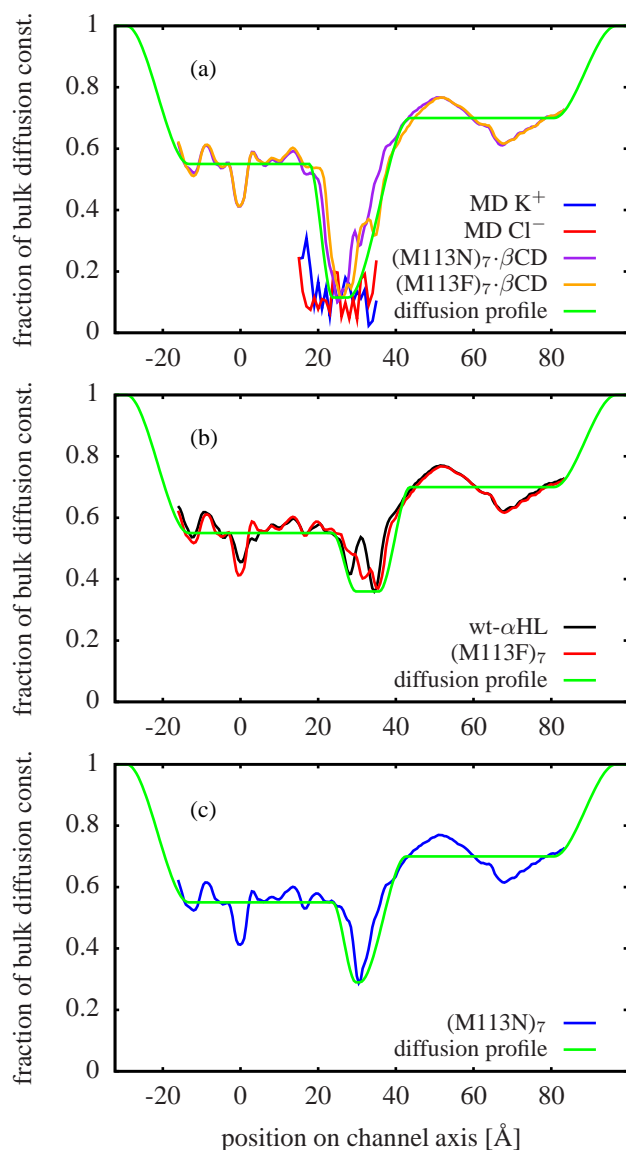

Figure S1: Fraction of the bulk diffusion constant for the different simulation systems. Green lines represent the smooth diffusion profiles used in GCMC/BD simulations. (a) MD simulation results for  $K^+$  and  $Cl^-$  in  $(M113N)_7 \cdot \beta CD$  as well as profiles for  $(M113N)_7 \cdot \beta CD$  and  $(M113F)_7 \cdot \beta CD$  calculated by a hydrodynamic approximation. Further diffusion profiles for (b)  $wt-\alpha HL$ ,  $(M113F)_7$ , and (c)  $(M113N)_7$ .
